# Supplementary material for: Streptococcus pneumoniae Serotype 1 Capsular Polysaccharide Induces CD8+CD28− Regulatory T Lymphocytes by TCR Crosslinking
Source: PubMed Central journal article supplement (PMC2742891; doi:10.1371/journal.ppat.1000596), 2009-09-25

Suppl. Figure S1, Mertens et al.

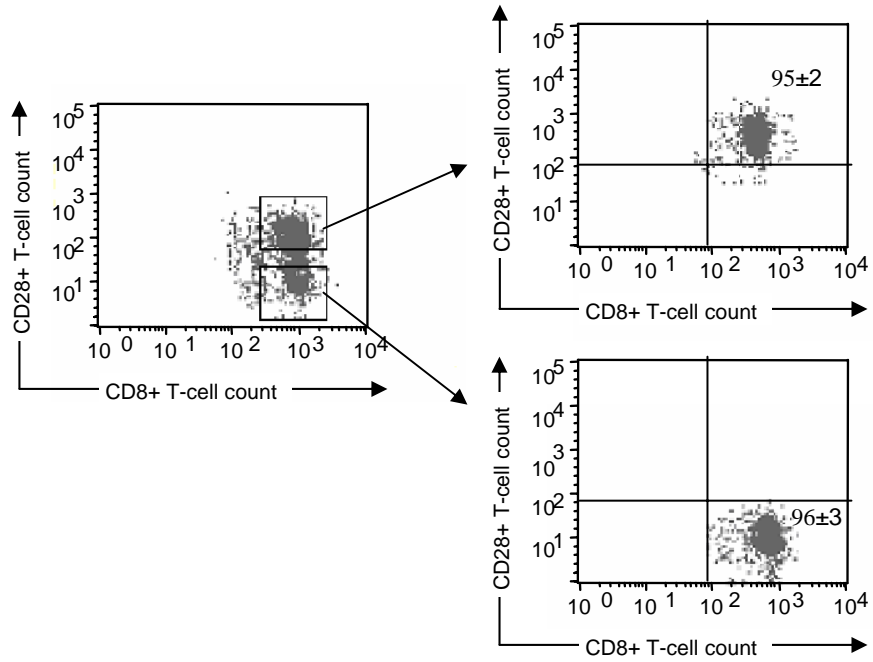

Supplement: ppat.1000596.s001.pdf [file ppat.1000596.s001.pdf]
